# Supplementary material
Source: PubMed Central journal article supplement (PMC3108567)
Supplement: NIHMS293191-supplement-Sup_fig_1.pdf [file NIHMS293191-supplement-Sup_fig_1.pdf]

SUPPLEMENTARY MATERIAL

FIGURE 1.

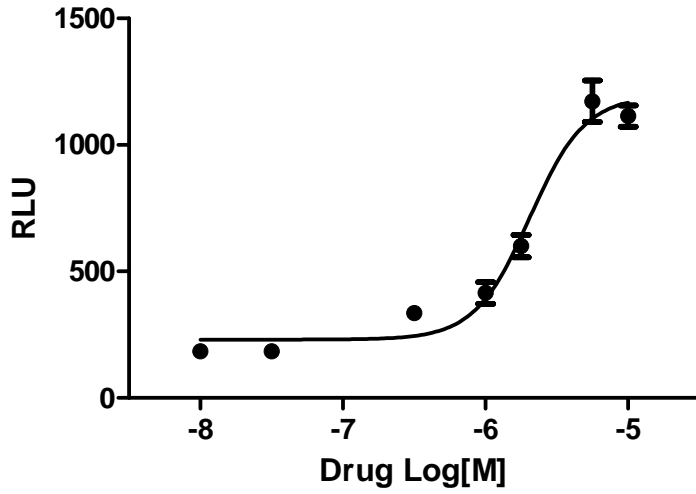

|      |                     |
|------|---------------------|
|      | CKI alpha Inhibitor |
| EC50 | 2.044e-006          |

**Supplementary FIG. 1.** 384-well A549 FKR Validation. 384-well dose dependent inhibition of FADD kinase activity in A549 FKR cells. Cells treated with CK1 $\alpha$  inhibitor as described in materials and methods. Two Independent experiments were performed with 16 replicates for each dose. Data points represent the mean  $\pm$  SEM for each condition.
