# Supplementary material
Source: PubMed Central journal article supplement (PMC3108567)
Supplement: NIHMS293191-supplement-Sup_fig_2.pdf [file NIHMS293191-supplement-Sup_fig_2.pdf]

**FIGURE 2.**

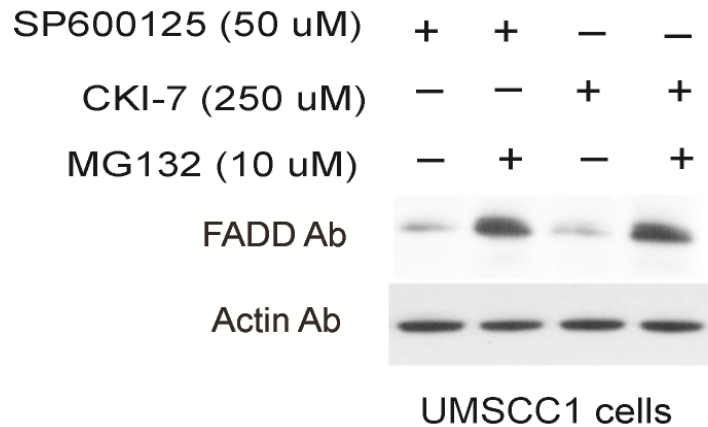

**Supplementary FIG. 2.** Degradation of FADD in response to treatment with inhibitors of FADD-phosphorylation is mediated by the proteasome. UMSCC1 cells were treated for 12 hrs in the presence or absence of MG132 in conjunction with a JNK inhibitor (SP600125) or CKI-7 (two known inhibitors of FADD-phosphorylation) and subjected to western blotting using antibodies to FADD and Actin.

Treatment of UMSCC1 cells with a JNK-inhibitor or a CK1 $\alpha$  inhibitor (CKI-7) results in a decrease in FADD phosphorylation (see above) and a subsequent degradation of FADD protein (between 8-12 hrs after treatment). Treatment of cells with MG132, a proteasome inhibitor, inhibits the degradation of FADD in response to inhibition of FADD phosphorylation.
